# Supplementary material for: Association of methyl donor nutrients dietary intake and sleep disorders in the elderly revealed by the intestinal microbiome
Source: Royal Society of Chemistry journal article supplement (doi:10.1039/d4fo01303d), 2024-01-01
Supplement: d4fo01303d1.pdf [file d4fo01303d1.pdf]

## SUPPLEMENTARY TABLES

**Supplementary Table 1** Demographic characteristics between the SD group and Control group. Differences in gender and history of hypnotic drug usage between groups were examined using

| Characteristics              | SD<br>(N=91) | Control<br>(N=147) | <i>P</i> -value |
|------------------------------|--------------|--------------------|-----------------|
| Gender (male)                | 26 (28.6)    | 42 (28.6)          | 1               |
| age                          | 65.42±2.82   | 65.66±2.62         | 0.501           |
| BMI                          | 24.72±3.08   | 24.39±3.38         | 0.455           |
| History of sleeping drug use | 7(7.70)      | 7(4.76)            | 0.350           |

Pearson's chi-square test. Differences in age and BMI between groups were examined using Mann-Whitney U test.

**Supplementary Table 2** Comparison of differences in MDN intake between the SD and Control groups.

| MDN Indicators | SD<br>(N=91)    | Control<br>(N=147) | <i>P</i> -value <sup>a</sup> | <i>P</i> -value <sup>b</sup> |
|----------------|-----------------|--------------------|------------------------------|------------------------------|
| MNQI           | 6.13 ± 3.52     | 7.08 ± 3.10        | 0.051                        | 0.036*                       |
| Protein        | 64.20 ± 31.85   | 73.08 ± 38.07      | 0.129                        | 0.065                        |
| Folate         | 323.06 ± 190.81 | 380.04 ± 226.91    | 0.074                        | 0.047*                       |
| Choline        | 295.17 ± 123.91 | 336.92 ± 148.21    | 0.070                        | 0.026*                       |
| Riboflavin     | 0.88 ± 0.48     | 1.04 ± 0.51        | 0.013*                       | 0.016*                       |
| VB 6           | 1.96 ± 1.09     | 2.23 ± 1.06        | 0.030*                       | 0.058                        |
| VB 12          | 1.65 ± 1.36     | 2.23 ± 2.69        | 0.008*                       | 0.055                        |
| Betaine        | 72.13 ± 72.50   | 79.98 ± 68.55      | 0.160                        | 0.402                        |
| Zn             | 7.35 ± 3.91     | 9.11 ± 5.388       | 0.024*                       | 0.007*                       |

\*  $P < 0.05$ , <sup>a</sup> Mann-Whitney U test, <sup>b</sup> independent-samples T test.
